# Supplementary material
Source: PubMed Central journal article supplement (PMC4861657)
Supplement: NIHMS777034-supplement-1.pdf [file NIHMS777034-supplement-1.pdf]

## **Supplementary Materials**

Figure S1: Full simulation of TGF $\beta$  vs forskolin treatment

Figure S2: Other validated relationships

Figure S3: Robustness of validation accuracy to changes in baseline input levels

Figure S4: Full sensitivity analysis

Figure S5: Clustering analysis

Figure S6: Full comparison of topological features vs influence

Table S1: Definitions of network topology metrics

Database S1: Network model

Database S2: Validation relationships

**Supplementary Figure 1: Full simulation of TGF- $\beta$  versus forskolin treatment.** Predicted dynamic activity of all nodes for 6 days of TGF- $\beta$  alone (A) or for 4 days of TGF- $\beta$  followed by 2 days of TGF- $\beta$  + forskolin. The difference in activation of each node with and without forskolin stimulation is plotted on the network to map the specific pathways altered in these two conditions (C).

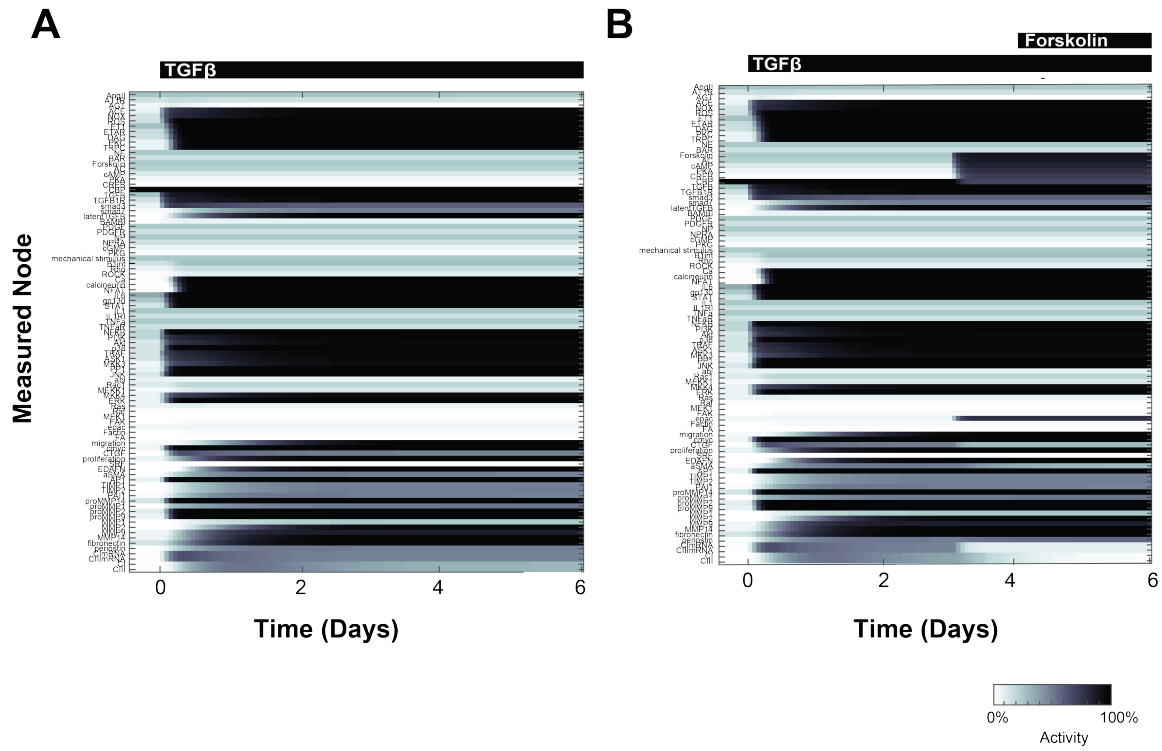

# C

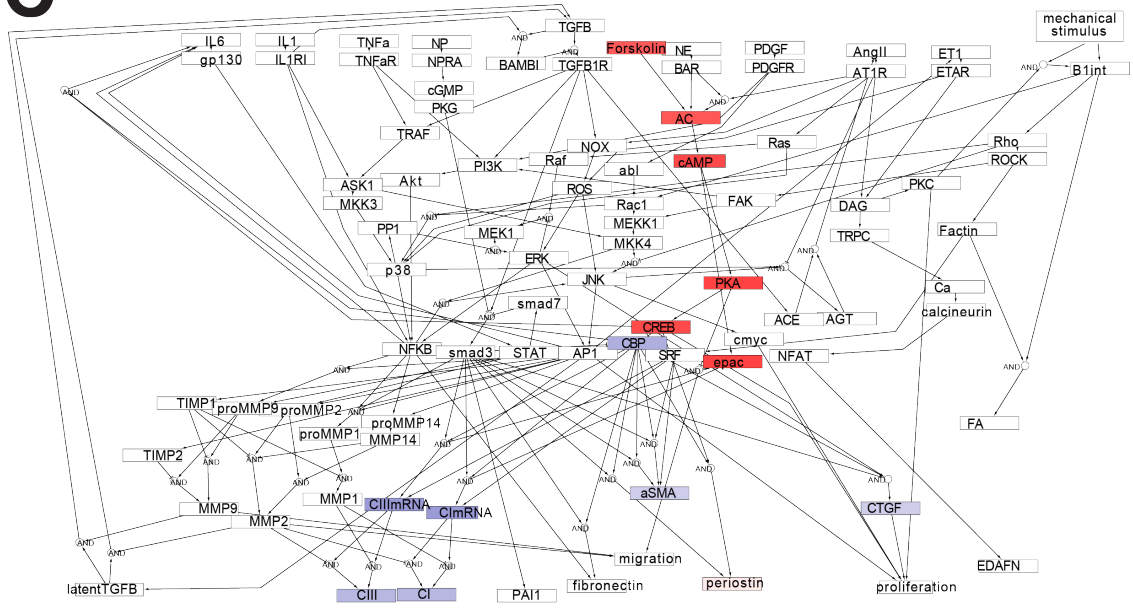

Change in activity:  
with forskolin - without forskolin

-0.4 0 0.7

### Figure S2: Other validated relationships.

Model prediction and comparison to experimental validation data for all relationships not included in the subset shown in Figure 3. Color indicates model prediction (blue for decrease, white for no change, red for increase) and the check indicates agreement with literature where an x indicates disagreement. Inputs are shown on the vertical axis and outputs are shown on the horizontal axis. Relationships are grouped by input.

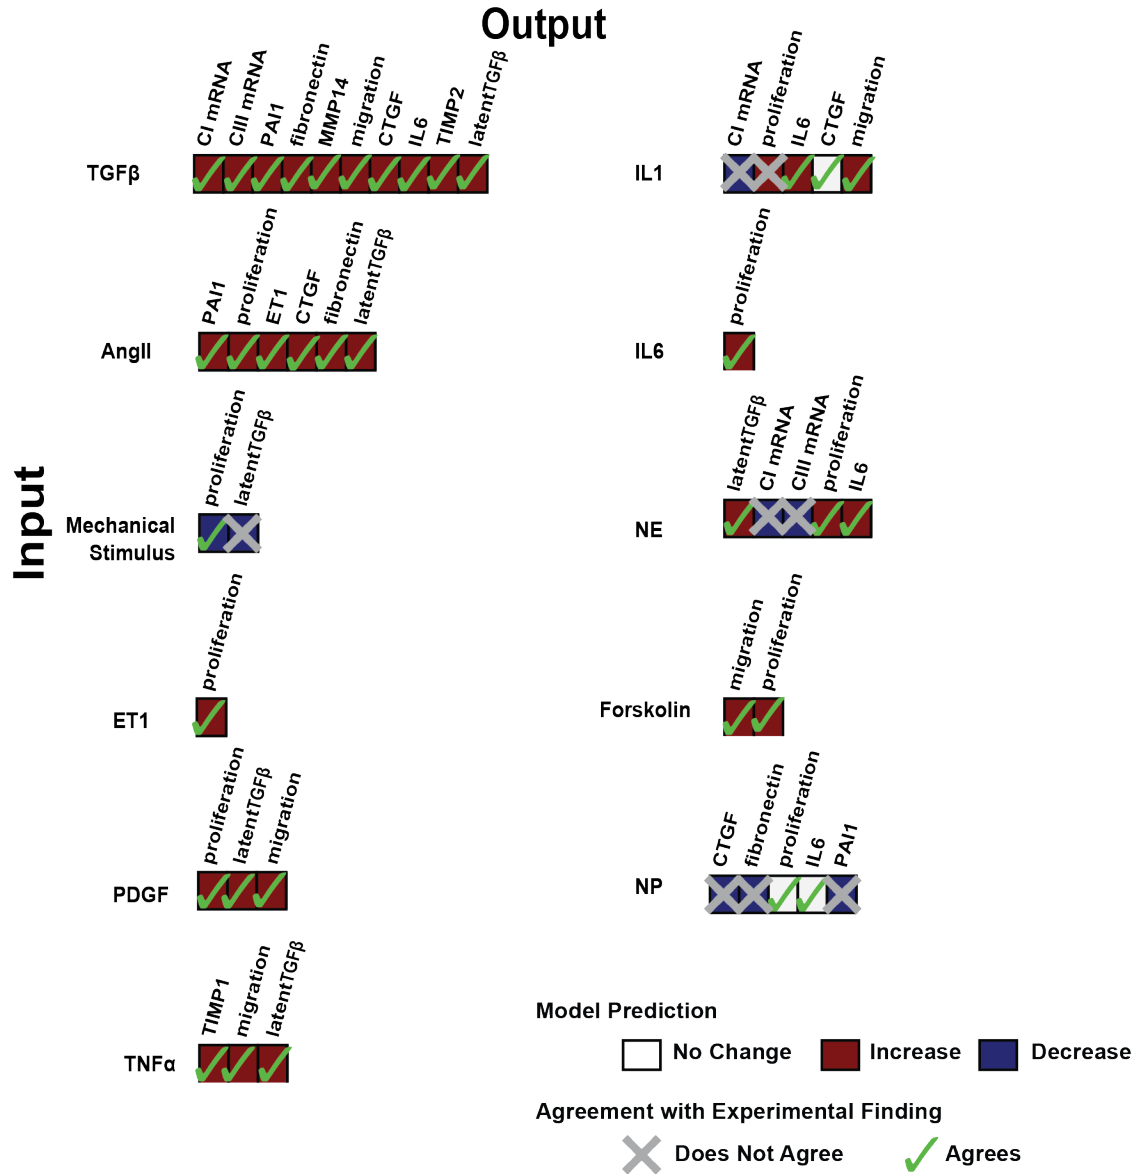

**Figure S3: Robustness of validation accuracy to changes in baseline input levels.**

The baseline input levels were varied within a uniform distribution of width 5%-50% of the original value (25% activity). This uniform distribution was sampled 100 times, and the validation accuracy was calculated for each random sampling represented at a dot in the plot. The validation accuracy is robust to variation within 12-37% activity.

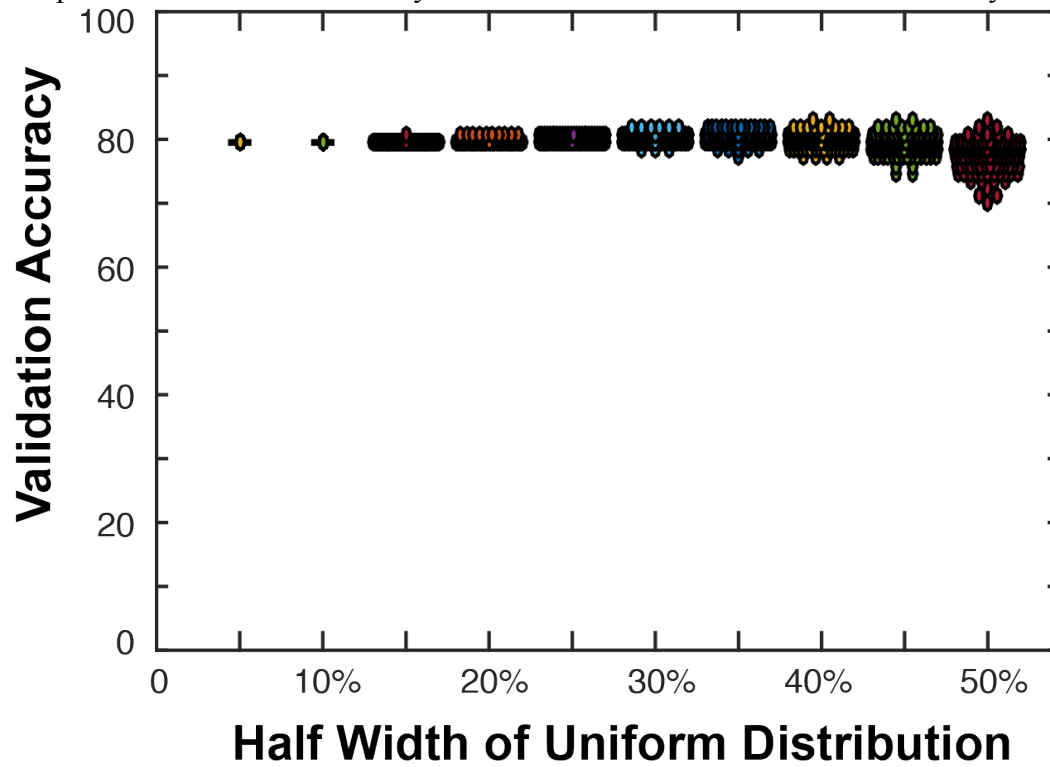

### Figure S4: Full sensitivity analysis.

Results of a full sensitivity analysis where all possible knock downs (x axis) are performed under baseline (A), high TGF $\beta$  (B), and high mechanical stimulus (C) signaling context and the change in activity (knock down - control) for each output node (y axis) is measured as a change in color. The top 10 most influential nodes (columns) and top 10 most sensitive nodes (rows) for the baseline and high TGF $\beta$  are shown in Fig. 4A-B. Blue indicates a decrease in activity with knock down of the perturbed node and red indicates an increase in activity with knock down of the perturbed node.

# A

## Signaling Context: Baseline

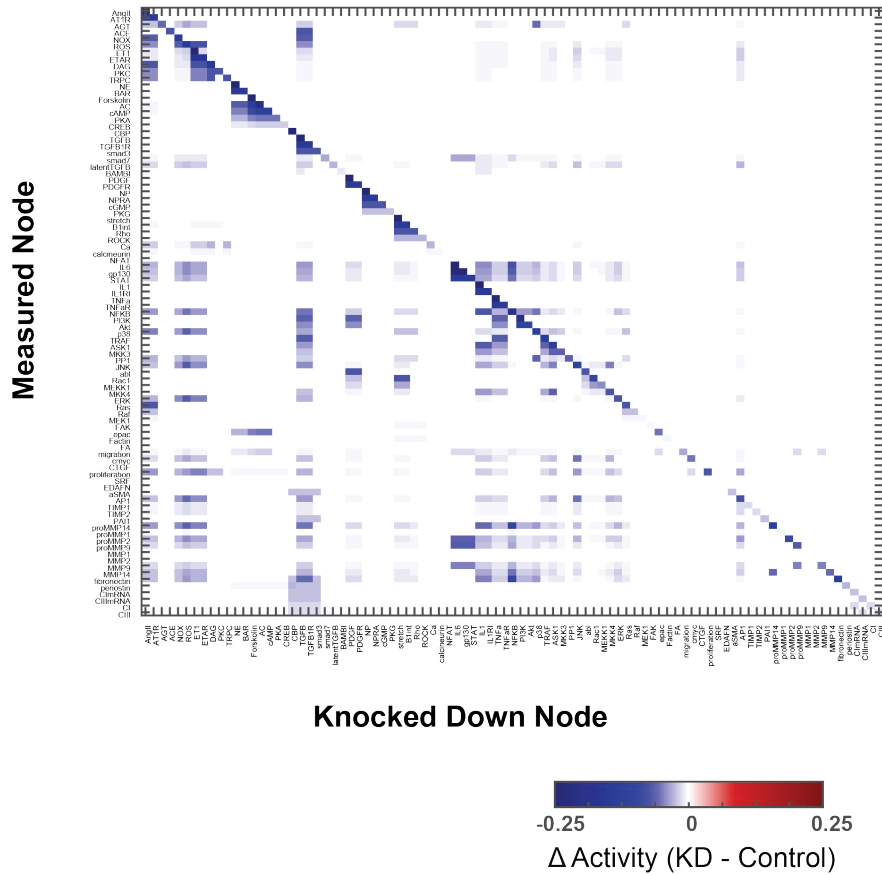



C

### Signaling Context: Mechanical Stimulus

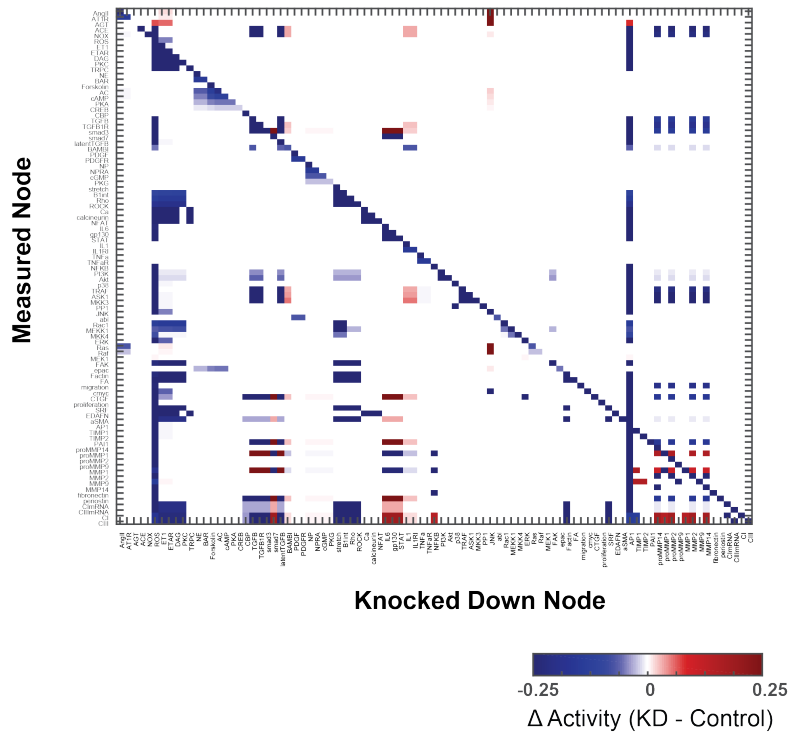



### Figure S5: Clustering analysis

(A) The full sensitivity analysis under high TGFβ signaling context ordered by cluster on both axes. (B) The full network with each node colored by module as labeled in A.

**A**

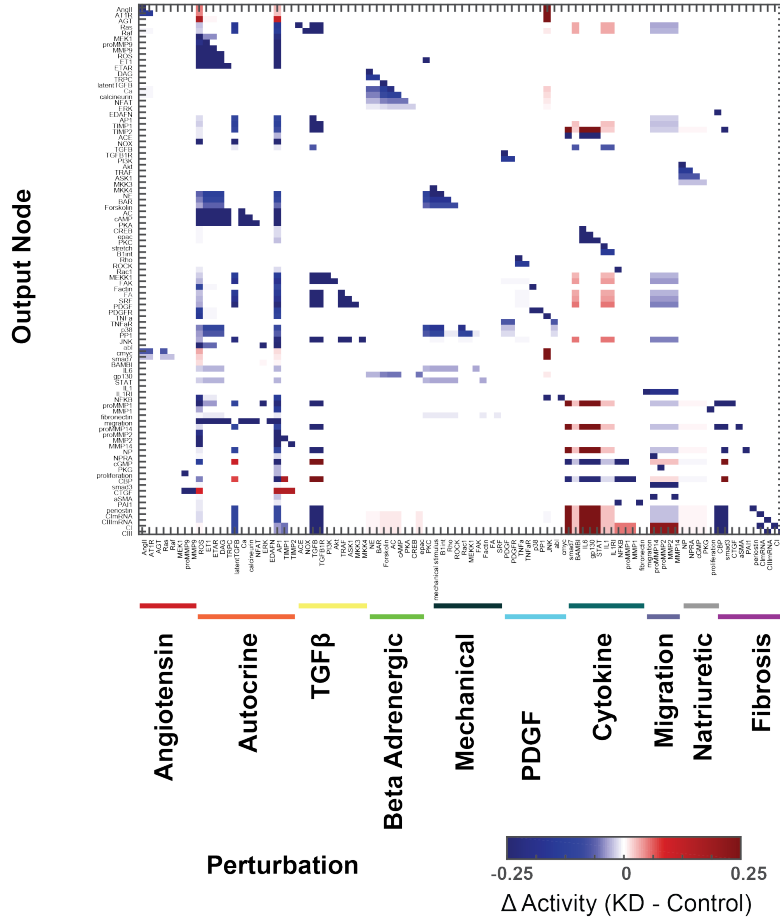

**B**

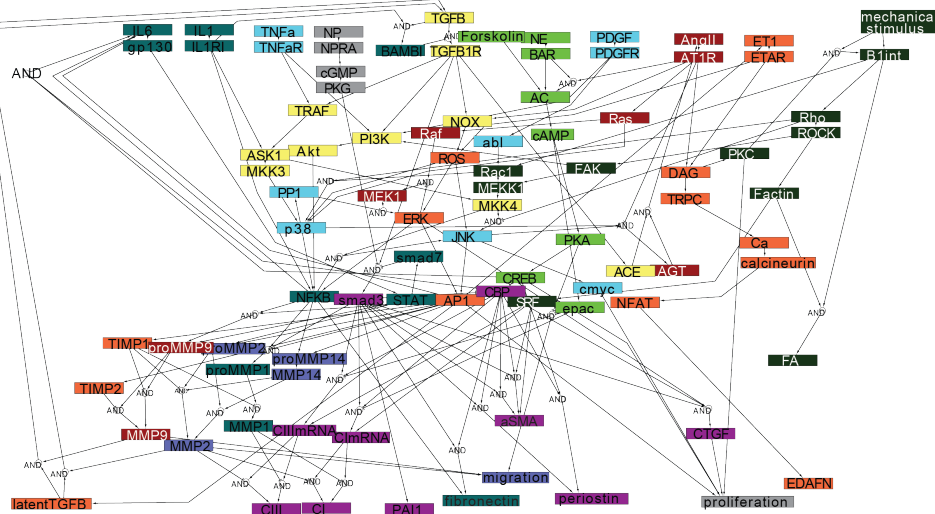

**Figure S6: Full comparison of topological features versus influence**

Each topological feature is plotted against influence. R2 values are shown.

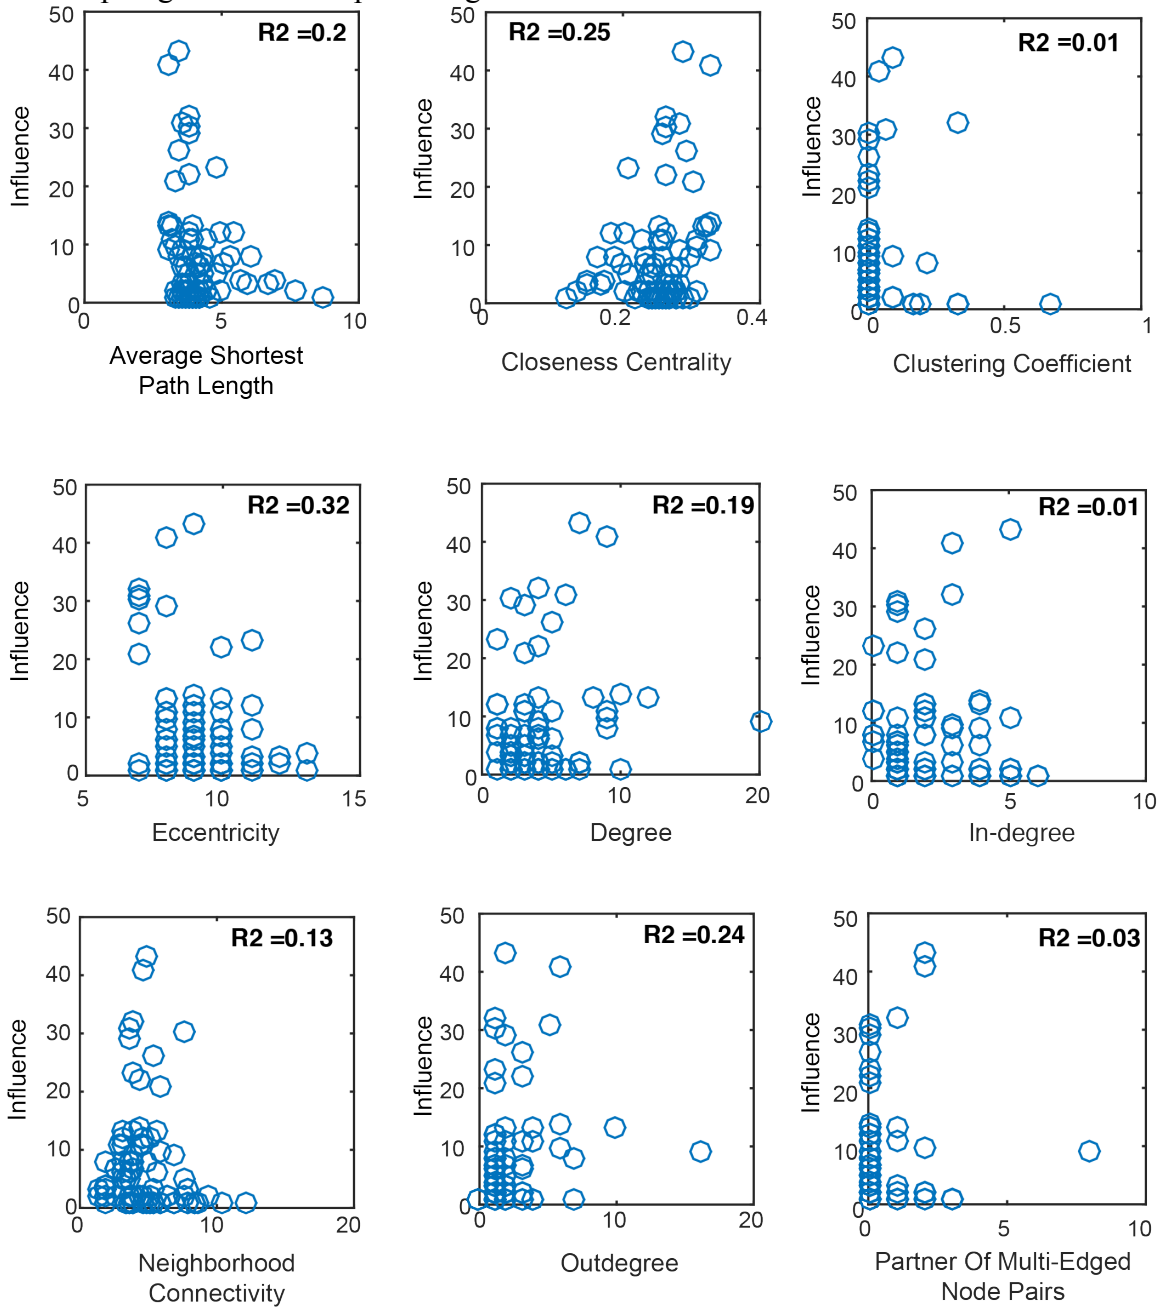

**Table S1: Definitions of network topology metrics**

Each topological feature as defined by Assenov et al in the NetworkAnalyzer plugin for Cytoscape used for topological analysis of the network [27],[28].

| <b>Topology Metric</b>            | <b>Definition</b>                                                                                                                             |
|-----------------------------------|-----------------------------------------------------------------------------------------------------------------------------------------------|
| betweenness centrality            | number of shortest paths from all nodes to all others that pass through node $n$                                                              |
| out-degree                        | number of edges that exit node $n$                                                                                                            |
| in-degree                         | number of edges that enter node $n$                                                                                                           |
| edge count                        | total number of edges connected to node $n$                                                                                                   |
| eccentricity                      | maximal length of a shortest path between node $n$ and any other node in the network                                                          |
| neighborhood connectivity         | average number of neighbors for all neighbors of node $n$                                                                                     |
| ave shortest path length          | average shortest path between node $n$ and any other node                                                                                     |
| closeness centrality              | the reciprocal of the average shortest path length from node $n$ (interpreted as a measure of how quickly information spreads from node $n$ ) |
| clustering coefficient            | measure of the degree to which node $n$ 's neighbors form a complete graph                                                                    |
| partner of multi-edged node pairs | how many nodes is node $n$ a partner of that has multiple edges                                                                               |

**Database S1: Network model**

This database includes information about each species (node) and each reaction in the cardiac fibroblast signaling network. Included are the names of each species and the genes they represent (when applicable) as well as parameters associated with the nodes or reactions. References for each gene and interaction are also included.

**Database S2: Validation relationships**

This database includes all input-output relationships validated by the network model as well as references for each relationship and the model prediction compared to the experimental finding.
